# Supplementary material
Source: ML conference proceedings conference paper supplement (https://openreview.net/forum?id=DuNf2vPTTK)

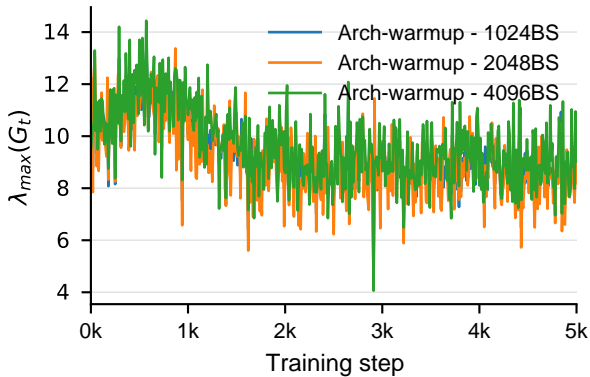

Supplement: supplementary_material [file lr_hessian_comparison_batchsize.pdf › 16318_Taming_Curvature_Archite_Supplementary Material_v2/torchtitan-archwarmup-arch-warmup-clean/plots/lr_hessian_comparison_batchsize.pdf]
